# Supplementary material
Source: HighWire-hosted journal article supplement (https://www.highwirestage.com/highwire/filestream/52824/field_highwire_adjunct_files/0/16-00332.pdf)
Supplement: 16-00332.pdf [file 16-00332.pdf]

**On-line Table: Demographic, imaging, and molecular features of PA and PA-GD**

|                              | PA (n = 34)                       |                  | PA-GD (n = 7)                    |      | P Value            |
|------------------------------|-----------------------------------|------------------|----------------------------------|------|--------------------|
| Demographics                 |                                   |                  |                                  |      |                    |
| Age at diagnosis (mean) (yr) | 6.7 ± 3.6                         |                  | 10.3 ± 3.0                       |      | .0232 <sup>a</sup> |
| % Female                     | 44.10%                            |                  | 28.60%                           |      | .6786              |
| Dominant site                |                                   |                  |                                  |      |                    |
| Midline                      | 13 <sup>a</sup>                   | 38% <sup>a</sup> | 7 <sup>a</sup>                   | 100% | .0034 <sup>a</sup> |
| Vermis                       | 9                                 | 69%              | 5                                | 71%  |                    |
| Brain stem                   | 4                                 | 31%              | 2                                | 29%  |                    |
| Off-midline                  | 21 <sup>a</sup>                   | 62% <sup>a</sup> | 0 <sup>a</sup>                   |      |                    |
| Cb                           | 16                                | 76%              | 0                                |      |                    |
| Cb+vermis                    | 3                                 | 14%              | 0                                |      |                    |
| MCP                          | 2                                 | 10%              | 0                                |      |                    |
| Circumscription              |                                   |                  |                                  |      |                    |
| Yes                          | 28                                | 82%              | 5                                | 71%  | .4159              |
| No                           | 3                                 | 9%               | 1                                | 14%  |                    |
| Mixed                        | 3                                 | 9%               | 1                                | 14%  |                    |
| Hemorrhage                   |                                   |                  |                                  |      |                    |
| Yes                          | 7                                 | 21%              | 3                                | 43%  | .3324              |
| No                           | 27                                | 79%              | 4                                | 57%  |                    |
| Cyst + nodule morphology     |                                   |                  |                                  |      |                    |
| Yes                          | 10                                | 29%              | 1                                | 14%  | .6514              |
| No                           | 24                                | 71%              | 6                                | 86%  |                    |
| % Enhancement                |                                   |                  |                                  |      |                    |
| 0%                           | 1                                 | 3%               | 0                                | 0%   | .5407              |
| <25%                         | 10                                | 29%              | 4                                | 57%  |                    |
| 25%–49%                      | 6                                 | 18%              | 0                                | 0%   |                    |
| 50%–75%                      | 7                                 | 21%              | 2                                | 29%  |                    |
| >75%                         | 10                                | 29%              | 1                                | 14%  |                    |
| % Cystic/necrotic            |                                   |                  |                                  |      |                    |
| 0%                           | 4                                 | 12%              | 1                                | 14%  | .365               |
| <25%                         | 9                                 | 26%              | 0                                | 0%   |                    |
| 25%–49%                      | 5                                 | 15%              | 2                                | 29%  |                    |
| 50%–75%                      | 7                                 | 21%              | 3                                | 43%  |                    |
| >75%                         | 9                                 | 26%              | 1                                | 14%  |                    |
| Edema                        |                                   |                  |                                  |      |                    |
| None                         | 2                                 | 6%               | 1                                | 14%  | .5261              |
| Minimal                      | 13                                | 38%              | 3                                | 43%  |                    |
| Mild                         | 9                                 | 26%              | 3                                | 43%  |                    |
| Moderate                     | 7                                 | 21%              | 0                                | 0%   |                    |
| Severe                       | 3                                 | 9%               | 0                                | 0%   |                    |
| rADC                         |                                   |                  |                                  |      |                    |
| Mean                         | 2.01 ± 0.38 <sup>a</sup> (n = 28) |                  | 1.01 ± 0.17 <sup>a</sup> (n = 5) |      | .0005 <sup>a</sup> |
| GTR                          |                                   |                  |                                  |      |                    |
| Yes                          | 23                                | 68% <sup>a</sup> | 1                                | 14%  | .0141 <sup>a</sup> |
| No                           | 11                                | 32%              | 6 <sup>a</sup>                   | 86%  |                    |
| Progression                  |                                   |                  |                                  |      |                    |
| Yes                          | 11                                | 32%              | 3                                | 43%  | .29%               |
| No                           | 23                                | 68%              | 2                                | 29%  |                    |
| Unknown                      | 0                                 | 0%               | 2                                | 29%  |                    |
| BRAF:p.V600E mutation        |                                   |                  |                                  |      |                    |
| Yes                          | 0                                 | 0%               | 0                                | 0%   | 100%               |
| No <sup>b</sup>              | 27                                | 79%              | 7                                | 100% |                    |
| Unknown                      | 7                                 | 21%              | 0                                | 0%   |                    |
| KIAA1549-BRAF fusion         |                                   |                  |                                  |      |                    |
| Yes                          | 31                                | 91%              | 5                                | 71%  | 29%                |
| No                           | 2                                 | 6%               | 2                                | 29%  |                    |
| Unknown                      | 1                                 | 3%               | 0                                | 0%   |                    |

**Note:**—Cb indicates cerebellar hemisphere; MCP, middle cerebellar peduncle.

<sup>a</sup> Difference between PA and PA-GD statistically significant.

<sup>b</sup> All 4 BRAF tumors negative for fusion were located in midline structures (PA, 2 in the vermis; PA-GD, 2 in the brain stem).
